# Supplementary material for: Comparison of Growth Characteristics and Active Compounds of Cultivated Hovenia dulcis under Different Environments in South Korea
Source: MDPI journal article supplement (doi:10.3390/d15080905), 2023-07-31
Supplement: s1 [file s1]

# Comparative Influences of Environmental Factors on Growth Characteristics and Active compounds of *Hovenia dulcis* From Different Cultivation Regions in Korea

Yonghwan Son <sup>1</sup>, Dong Hwan Lee <sup>1</sup>, Gwang Hun Park <sup>1</sup>, Jun-Hyuk Jang <sup>1</sup>, Ji Ah Kim <sup>1</sup>, Youngki Park <sup>2</sup>, Sun-Young Lee <sup>1</sup> and Hyun-Jun Kim <sup>1\*</sup>

<sup>1</sup> Forest Medicinal Resources Research Center, National Institute of Forest Science, Yeongju 36040, Korea;  
thsdydghks@korea.kr (Y.S.); leedh0419@korea.kr (D.H.L.); ppkh0230@korea.kr (G.H.P.); wnseldu123@korea.kr (J.-H.J.); jiahkim@korea.kr (J.A.K.);  
nararawood@korea.kr (S.-Y.L.)

<sup>2</sup> Forest Bioresources Department, National Institute of Forest Science, Suwon 16631, Korea;  
woodpark@korea.kr (Y.P.)

\* Correspondence: mind4938@korea.kr

**Table S1.** Growth characteristics of *Hovenia dulcis* in 17 different cultivation sites

|    | Length of the<br>fruit bunch | Width of the<br>fruit bunch | No. of peduncles<br>per fruit | Length of<br>peduncle        | Width of<br>peduncle       | Diameter of<br>peduncle     | Fresh weight<br>of peduncle | No. of seeds<br>per peduncle | Sugar contents<br>of peduncle | Fresh weight<br>of 10 peduncle |
|----|------------------------------|-----------------------------|-------------------------------|------------------------------|----------------------------|-----------------------------|-----------------------------|------------------------------|-------------------------------|--------------------------------|
|    | (mm)                         | (mm)                        | (ea)                          | (mm)                         | (mm)                       | (mm)                        | (g)                         | (ea)                         | (°Bx)                         | (g)                            |
| 1  | 53.52 ± 6.02 <sup>abc</sup>  | 45.53 ± 2.31 <sup>abc</sup> | 5.89 ± 1.07 <sup>bc</sup>     | 16.45 ± 1.37 <sup>cd</sup>   | 35.89 ± 2.97 <sup>ab</sup> | 5.08 ± 0.45 <sup>bcd</sup>  | 1.24 ± 0.14 <sup>b</sup>    | 2.78 ± 0.38 <sup>cde</sup>   | 37.19 ± 3.12 <sup>abcd</sup>  | 11.65 ± 0.34 <sup>cd</sup>     |
| 2  | 44.42 ± 3.23 <sup>bc</sup>   | 49.64 ± 4.29 <sup>ab</sup>  | 7.67 ± 0.33 <sup>b</sup>      | 19.51 ± 2.95 <sup>abcd</sup> | 38.82 ± 2.08 <sup>ab</sup> | 5.09 ± 0.49 <sup>bcd</sup>  | 1.11 ± 0.40 <sup>bc</sup>   | 0.56 ± 0.69 <sup>f</sup>     | 43.01 ± 1.63 <sup>a</sup>     | 11.32 ± 3.20 <sup>cd</sup>     |
| 3  | 45.95 ± 5.16 <sup>abc</sup>  | 50.64 ± 1.50 <sup>ab</sup>  | 6.44 ± 1.64 <sup>bc</sup>     | 18.59 ± 0.99 <sup>abcd</sup> | 34.93 ± 5.27 <sup>ab</sup> | 5.61 ± 0.05 <sup>abcd</sup> | 1.16 ± 0.26 <sup>bc</sup>   | 2.89 ± 0.19 <sup>bcde</sup>  | 39.50 ± 1.86 <sup>abcd</sup>  | 11.82 ± 2.13 <sup>cd</sup>     |
| 4  | 48.00 ± 4.36 <sup>abc</sup>  | 37.05 ± 7.74 <sup>c</sup>   | 4.22 ± 0.19 <sup>c</sup>      | 16.46 ± 3.44 <sup>cd</sup>   | 22.83 ± 4.29 <sup>c</sup>  | 4.25 ± 1.65 <sup>d</sup>    | 0.68 ± 0.24 <sup>c</sup>    | 3.11 ± 0.51 <sup>abcd</sup>  | 37.60 ± 3.54 <sup>abcd</sup>  | 8.31 ± 2.05 <sup>d</sup>       |
| 5  | 63.75 ± 12.13 <sup>ab</sup>  | 45.33 ± 2.35 <sup>abc</sup> | 5.22 ± 0.38 <sup>c</sup>      | 17.35 ± 1.20 <sup>bcd</sup>  | 36.49 ± 3.37 <sup>ab</sup> | 4.45 ± 1.25 <sup>cd</sup>   | 1.34 ± 0.26 <sup>b</sup>    | 3.00 ± 0.67 <sup>abcd</sup>  | 37.91 ± 1.64 <sup>abcd</sup>  | 12.90 ± 1.47 <sup>bc</sup>     |
| 6  | 47.39 ± 0.27 <sup>abc</sup>  | 41.87 ± 3.57 <sup>bc</sup>  | 5.67 ± 0.33 <sup>bc</sup>     | 15.50 ± 1.53 <sup>d</sup>    | 33.94 ± 3.83 <sup>ab</sup> | 5.17 ± 0.32 <sup>bcd</sup>  | 1.14 ± 0.09 <sup>bc</sup>   | 1.89 ± 0.19 <sup>e</sup>     | 41.95 ± 1.72 <sup>ab</sup>    | 11.46 ± 1.78 <sup>cd</sup>     |
| 7  | 54.03 ± 5.71 <sup>abc</sup>  | 53.80 ± 3.48 <sup>a</sup>   | 10.00 ± 1.86 <sup>a</sup>     | 17.13 ± 0.99 <sup>bcd</sup>  | 40.84 ± 1.09 <sup>a</sup>  | 5.17 ± 0.84 <sup>bcd</sup>  | 1.17 ± 0.03 <sup>bc</sup>   | 2.67 ± 0.88 <sup>cde</sup>   | 36.24 ± 4.55 <sup>abcd</sup>  | 11.13 ± 0.58 <sup>cd</sup>     |
| 8  | 48.44 ± 19.93 <sup>abc</sup> | 41.51 ± 9.44 <sup>bc</sup>  | 5.44 ± 2.01 <sup>bc</sup>     | 20.41 ± 1.52 <sup>abc</sup>  | 35.52 ± 7.10 <sup>ab</sup> | 5.77 ± 1.71 <sup>abcd</sup> | 1.20 ± 0.37 <sup>bc</sup>   | 2.78 ± 0.51 <sup>cde</sup>   | 40.51 ± 3.51 <sup>abc</sup>   | 11.90 ± 1.91 <sup>c</sup>      |
| 9  | 56.57 ± 8.13 <sup>abc</sup>  | 52.22 ± 8.14 <sup>ab</sup>  | 5.11 ± 0.51 <sup>c</sup>      | 18.81 ± 1.99 <sup>abcd</sup> | 35.23 ± 6.05 <sup>ab</sup> | 5.26 ± 0.64 <sup>bcd</sup>  | 1.08 ± 0.31 <sup>bc</sup>   | 3.89 ± 0.69 <sup>ab</sup>    | 37.63 ± 2.66 <sup>abcd</sup>  | 11.35 ± 1.01 <sup>cd</sup>     |
| 10 | 52.49 ± 7.55 <sup>abc</sup>  | 54.10 ± 8.43 <sup>a</sup>   | 6.22 ± 1.50 <sup>bc</sup>     | 22.44 ± 3.16 <sup>a</sup>    | 34.93 ± 5.10 <sup>ab</sup> | 5.51 ± 0.58 <sup>abcd</sup> | 1.16 ± 0.33 <sup>bc</sup>   | 2.33 ± 0.58 <sup>cde</sup>   | 42.70 ± 1.15 <sup>a</sup>     | 12.79 ± 1.81 <sup>bc</sup>     |
| 11 | 55.12 ± 10.48 <sup>abc</sup> | 54.50 ± 4.63 <sup>a</sup>   | 4.33 ± 1.20 <sup>c</sup>      | 20.60 ± 0.95 <sup>abc</sup>  | 36.37 ± 1.96 <sup>ab</sup> | 5.91 ± 0.57 <sup>abc</sup>  | 1.12 ± 0.10 <sup>bc</sup>   | 2.22 ± 0.69 <sup>de</sup>    | 33.01 ± 1.49 <sup>d</sup>     | 12.35 ± 0.29 <sup>bc</sup>     |
| 12 | 62.35 ± 20.88 <sup>ab</sup>  | 54.27 ± 3.89 <sup>a</sup>   | 4.78 ± 0.51 <sup>c</sup>      | 21.68 ± 4.20 <sup>ab</sup>   | 41.79 ± 5.96 <sup>a</sup>  | 6.10 ± 0.21 <sup>ab</sup>   | 2.51 ± 0.36 <sup>a</sup>    | 4.00 ± 0.33 <sup>a</sup>     | 33.71 ± 1.14 <sup>cd</sup>    | 25.19 ± 3.44 <sup>a</sup>      |
| 13 | 52.17 ± 4.10 <sup>abc</sup>  | 57.00 ± 6.85 <sup>a</sup>   | 5.67 ± 1.33 <sup>bc</sup>     | 22.45 ± 3.05 <sup>a</sup>    | 38.17 ± 4.33 <sup>ab</sup> | 5.64 ± 0.99 <sup>abcd</sup> | 1.52 ± 0.38 <sup>b</sup>    | 2.73 ± 0.84 <sup>cde</sup>   | 36.24 ± 3.08 <sup>abcd</sup>  | 15.84 ± 2.85 <sup>b</sup>      |
| 14 | 52.11 ± 4.33 <sup>abc</sup>  | 55.79 ± 4.56 <sup>a</sup>   | 6.44 ± 1.71 <sup>bc</sup>     | 22.26 ± 0.88 <sup>a</sup>    | 35.31 ± 1.86 <sup>ab</sup> | 5.95 ± 0.51 <sup>abc</sup>  | 1.31 ± 0.29 <sup>b</sup>    | 3.00 ± 0.58 <sup>abcd</sup>  | 36.18 ± 0.71 <sup>abcd</sup>  | 13.13 ± 1.76 <sup>bc</sup>     |
| 15 | 52.29 ± 8.49 <sup>abc</sup>  | 54.50 ± 10.81 <sup>a</sup>  | 5.78 ± 0.69 <sup>bc</sup>     | 21.30 ± 2.08 <sup>ab</sup>   | 40.24 ± 9.25 <sup>ab</sup> | 6.86 ± 0.44 <sup>a</sup>    | 1.50 ± 0.12 <sup>b</sup>    | 2.44 ± 0.19 <sup>cde</sup>   | 38.00 ± 1.76 <sup>abcd</sup>  | 14.69 ± 1.12 <sup>bc</sup>     |
| 16 | 64.83 ± 6.45 <sup>a</sup>    | 51.79 ± 5.94 <sup>ab</sup>  | 6.56 ± 1.50 <sup>bc</sup>     | 19.32 ± 4.18 <sup>abcd</sup> | 38.74 ± 3.36 <sup>ab</sup> | 4.63 ± 0.41 <sup>bcd</sup>  | 1.19 ± 0.36 <sup>bc</sup>   | 2.56 ± 0.19 <sup>cde</sup>   | 32.74 ± 10.88 <sup>d</sup>    | 12.20 ± 1.09 <sup>c</sup>      |
| 17 | 42.46 ± 12.51 <sup>c</sup>   | 42.30 ± 3.83 <sup>bc</sup>  | 4.44 ± 0.77 <sup>c</sup>      | 17.47 ± 1.61 <sup>bcd</sup>  | 31.27 ± 2.29 <sup>b</sup>  | 5.36 ± 0.20 <sup>abcd</sup> | 1.41 ± 0.05 <sup>b</sup>    | 3.33 ± 0.58 <sup>abc</sup>   | 35.39 ± 3.06 <sup>bcd</sup>   | 14.57 ± 0.90 <sup>bc</sup>     |

Different letters in each column with different alphabets are statistically differences ( $p < 0.05$ ) among the treatments according to Duncan's test

**Table S2.** Soil properties data of 17 different cultivation sites of *Hovenia dulcis*

|    | OM                       | TN                         | Avail. P <sub>2</sub> O <sub>5</sub> | Exchangeable cation                 |                            |                           |                         |
|----|--------------------------|----------------------------|--------------------------------------|-------------------------------------|----------------------------|---------------------------|-------------------------|
|    |                          |                            |                                      | K <sup>+</sup>                      | Ca <sup>2+</sup>           | Mg <sup>2+</sup>          | Na <sup>+</sup>         |
|    | (%)                      | (%)                        | (mg/kg)                              | ----- (cmol <sup>+</sup> /kg) ----- |                            |                           |                         |
| 1  | 4.53±0.04 <sup>bcd</sup> | 0.22±0.08 <sup>cdefg</sup> | 304.22±82.85 <sup>efgh</sup>         | 0.40±0.10 <sup>c</sup>              | 8.03±4.80 <sup>defg</sup>  | 1.27±0.56 <sup>bcd</sup>  | 0.01±0.01 <sup>d</sup>  |
| 2  | 5.10±0.79 <sup>bcd</sup> | 0.30±0.06 <sup>bcd</sup>   | 138.35±40.70 <sup>gh</sup>           | 0.85±0.06 <sup>bc</sup>             | 8.25±0.99 <sup>cdefg</sup> | 2.57±0.13 <sup>abcd</sup> | 0.08±0.01 <sup>ab</sup> |
| 3  | 3.85±0.73 <sup>bcd</sup> | 0.22±0.08 <sup>cdefg</sup> | 758.99±84.25 <sup>cdef</sup>         | 0.86±0.30 <sup>bc</sup>             | 7.50±2.12 <sup>defg</sup>  | 1.37±0.19 <sup>bcd</sup>  | 0.04±0.02 <sup>cd</sup> |
| 4  | 10.53±0.59 <sup>a</sup>  | 0.48±0.09 <sup>ab</sup>    | 870.18±122.47 <sup>cde</sup>         | 0.65±0.37 <sup>bc</sup>             | 5.08±1.96 <sup>fg</sup>    | 1.35±1.03 <sup>bcd</sup>  | 0.03±0.02 <sup>cd</sup> |
| 5  | 7.47±2.70 <sup>ab</sup>  | 0.42±0.09 <sup>abc</sup>   | 1800.40±445.38 <sup>ab</sup>         | 1.02±0.22 <sup>b</sup>              | 14.06±3.48 <sup>bc</sup>   | 1.90±1.26 <sup>bcd</sup>  | 0.02±0.00 <sup>d</sup>  |
| 6  | 4.28±1.79 <sup>bcd</sup> | 0.26±0.13 <sup>cdefg</sup> | 1000.64±577.46 <sup>cd</sup>         | 0.82±0.35 <sup>bc</sup>             | 8.65±4.37 <sup>cdefg</sup> | 2.04±1.16 <sup>bcd</sup>  | 0.02±0.01 <sup>cd</sup> |
| 7  | 6.91±1.99 <sup>b</sup>   | 0.38±0.09 <sup>abcd</sup>  | 1855.04±337.64 <sup>a</sup>          | 1.64±0.57 <sup>a</sup>              | 10.72±2.54 <sup>cdef</sup> | 3.07±1.45 <sup>ab</sup>   | 0.04±0.02 <sup>cd</sup> |
| 8  | 3.03±0.51 <sup>cde</sup> | 0.17±0.04 <sup>defg</sup>  | 1225.00±701.86 <sup>c</sup>          | 0.49±0.11 <sup>bc</sup>             | 11.44±5.83 <sup>cde</sup>  | 0.68±0.17 <sup>e</sup>    | 0.06±0.05 <sup>bc</sup> |
| 9  | 6.40±1.04 <sup>bc</sup>  | 0.36±0.05 <sup>abcde</sup> | 1145.11±267.80 <sup>cd</sup>         | 0.82±0.19 <sup>bc</sup>             | 8.03±1.62 <sup>defg</sup>  | 2.01±0.50 <sup>bcd</sup>  | 0.04±0.01 <sup>cd</sup> |
| 10 | 4.11±1.18 <sup>bcd</sup> | 0.25±0.12 <sup>cdefg</sup> | 696.13±612.50 <sup>cdefg</sup>       | 0.88±0.02 <sup>bc</sup>             | 10.45±2.24 <sup>cdef</sup> | 2.08±0.75 <sup>bcd</sup>  | 0.11±0.02 <sup>a</sup>  |
| 11 | 2.62±0.71 <sup>de</sup>  | 0.14±0.02 <sup>fg</sup>    | 117.10±24.85 <sup>gh</sup>           | 0.33±0.05 <sup>c</sup>              | 7.48±0.98 <sup>defg</sup>  | 1.21±0.02 <sup>cde</sup>  | 0.06±0.02 <sup>bc</sup> |
| 12 | 10.25±2.78 <sup>a</sup>  | 0.55±0.17 <sup>a</sup>     | 1273.28±283.71 <sup>bc</sup>         | 0.97±0.47 <sup>b</sup>              | 17.57±2.70 <sup>ab</sup>   | 3.91±1.08 <sup>a</sup>    | 0.03±0.02 <sup>cd</sup> |
| 13 | 5.26±3.52 <sup>bcd</sup> | 0.28±0.21 <sup>bcd</sup>   | 241.47±158.25 <sup>fgh</sup>         | 0.80±0.30 <sup>bc</sup>             | 2.78±2.32 <sup>g</sup>     | 1.23±1.05 <sup>bcd</sup>  | 0.03±0.02 <sup>cd</sup> |
| 14 | 2.52±1.44 <sup>de</sup>  | 0.16±0.10 <sup>efg</sup>   | 54.26±30.59 <sup>h</sup>             | 0.35±0.13 <sup>c</sup>              | 5.69±2.49 <sup>efg</sup>   | 0.81±0.47 <sup>de</sup>   | 0.02±0.00 <sup>d</sup>  |
| 15 | 1.29±0.29 <sup>e</sup>   | 0.09±0.01 <sup>g</sup>     | 117.37±28.07 <sup>gh</sup>           | 0.73±0.11 <sup>bc</sup>             | 7.73±1.86 <sup>defg</sup>  | 2.17±1.50 <sup>bcd</sup>  | 0.06±0.03 <sup>bc</sup> |
| 16 | 5.85±2.66 <sup>bcd</sup> | 0.33±0.16 <sup>bcd</sup>   | 783.35±27.65 <sup>cdef</sup>         | 0.68±0.34 <sup>bc</sup>             | 11.92±5.04 <sup>cd</sup>   | 1.17±0.31 <sup>de</sup>   | 0.04±0.01 <sup>cd</sup> |
| 17 | 5.49±2.61 <sup>bcd</sup> | 0.30±0.14 <sup>bcd</sup>   | 553.50±38.03 <sup>defgh</sup>        | 0.61±0.28 <sup>bc</sup>             | 20.14±2.50 <sup>a</sup>    | 3.03±1.68 <sup>abc</sup>  | 0.03±0.01 <sup>cd</sup> |

Different letters in each column with different alphabets are statistically differences ( $p < 0.05$ ) among the treatments according to Duncan's test

**Table S3.** Soil properties data of 17 different cultivation sites of *Hovenia dulcis*

|    | CEC                        | pH                         | EC                      | Sand                      | Silt                      | Clay                       |
|----|----------------------------|----------------------------|-------------------------|---------------------------|---------------------------|----------------------------|
|    | (cmol <sup>+</sup> /kg)    | (1:5)                      | (ds/m)                  | ------(%)-----            |                           |                            |
| 1  | 16.93±4.80 <sup>abcd</sup> | 6.04±0.57 <sup>bcdef</sup> | 0.12±0.05 <sup>c</sup>  | 75.14±1.31 <sup>abc</sup> | 13.53±1.67 <sup>h</sup>   | 11.33±2.65 <sup>def</sup>  |
| 2  | 17.04±3.56 <sup>abcd</sup> | 5.53±0.14 <sup>efg</sup>   | 0.16±0.01 <sup>bc</sup> | 73.73±1.96 <sup>bcd</sup> | 12.29±1.06 <sup>h</sup>   | 13.98±3.02 <sup>bcd</sup>  |
| 3  | 16.35±1.34 <sup>abcd</sup> | 4.69±0.32 <sup>h</sup>     | 0.38±0.21 <sup>b</sup>  | 71.38±1.23 <sup>de</sup>  | 16.41±0.77 <sup>fg</sup>  | 12.20±1.62 <sup>cde</sup>  |
| 4  | 23.17±1.99 <sup>a</sup>    | 4.76±0.45 <sup>gh</sup>    | 0.24±0.01 <sup>bc</sup> | 76.75±1.69 <sup>ab</sup>  | 13.88±1.55 <sup>h</sup>   | 9.36±0.44 <sup>efg</sup>   |
| 5  | 22.39±5.03 <sup>ab</sup>   | 5.53±0.52 <sup>efg</sup>   | 0.61±0.41 <sup>a</sup>  | 77.07±1.42 <sup>a</sup>   | 14.16±1.15 <sup>gh</sup>  | 8.77±2.35 <sup>efg</sup>   |
| 6  | 15.57±5.77 <sup>bcd</sup>  | 6.00±0.98 <sup>bcdef</sup> | 0.15±0.05 <sup>bc</sup> | 76.99±1.42 <sup>a</sup>   | 9.49±1.08 <sup>i</sup>    | 13.52±0.73 <sup>bcd</sup>  |
| 7  | 18.48±4.74 <sup>abc</sup>  | 6.58±0.42 <sup>abc</sup>   | 0.20±0.04 <sup>bc</sup> | 64.54±3.89 <sup>fg</sup>  | 18.80±1.61 <sup>def</sup> | 16.66±3.02 <sup>ab</sup>   |
| 8  | 16.70±1.39 <sup>abcd</sup> | 6.99±0.69 <sup>a</sup>     | 0.18±0.15 <sup>bc</sup> | 61.78±1.38 <sup>g</sup>   | 20.23±1.81 <sup>d</sup>   | 17.99±1.63 <sup>a</sup>    |
| 9  | 19.23±1.01 <sup>abc</sup>  | 5.21±0.25 <sup>fgh</sup>   | 0.23±0.04 <sup>bc</sup> | 67.14±1.32 <sup>f</sup>   | 17.16±1.43 <sup>ef</sup>  | 15.70±1.20 <sup>abc</sup>  |
| 10 | 18.42±0.80 <sup>abc</sup>  | 5.78±0.28 <sup>cdef</sup>  | 0.22±0.08 <sup>bc</sup> | 70.38±2.35 <sup>e</sup>   | 22.50±1.46 <sup>c</sup>   | 7.13±1.06 <sup>g</sup>     |
| 11 | 14.29±1.04 <sup>cd</sup>   | 5.64±0.31 <sup>def</sup>   | 0.10±0.03 <sup>c</sup>  | 71.73±1.15 <sup>de</sup>  | 19.52±0.92 <sup>de</sup>  | 8.75±0.83 <sup>efg</sup>   |
| 12 | 22.44±5.58 <sup>ab</sup>   | 6.89±0.31 <sup>a</sup>     | 0.26±0.08 <sup>bc</sup> | 65.65±2.09 <sup>f</sup>   | 23.55±1.54 <sup>bc</sup>  | 10.80±0.70 <sup>defg</sup> |
| 13 | 18.43±5.81 <sup>abc</sup>  | 4.43±0.20 <sup>h</sup>     | 0.19±0.10 <sup>bc</sup> | 72.37±0.98 <sup>cde</sup> | 20.01±1.59 <sup>d</sup>   | 7.62±2.48 <sup>fg</sup>    |
| 14 | 14.68±1.39 <sup>cd</sup>   | 6.31±0.20 <sup>abcde</sup> | 0.08±0.04 <sup>c</sup>  | 61.66±1.92 <sup>g</sup>   | 29.21±0.88 <sup>a</sup>   | 9.13±2.79 <sup>efg</sup>   |
| 15 | 11.07±1.33 <sup>d</sup>    | 6.71±0.25 <sup>ab</sup>    | 0.09±0.01 <sup>c</sup>  | 71.05±0.97 <sup>de</sup>  | 16.52±0.79 <sup>fg</sup>  | 12.43±1.54 <sup>cde</sup>  |
| 16 | 20.04±3.08 <sup>abc</sup>  | 6.49±0.14 <sup>abcd</sup>  | 0.13±0.05 <sup>bc</sup> | 65.24±1.01 <sup>f</sup>   | 23.89±1.95 <sup>bc</sup>  | 10.87±2.64 <sup>defg</sup> |
| 17 | 20.38±2.45 <sup>abc</sup>  | 6.95±0.72 <sup>a</sup>     | 0.22±0.08 <sup>bc</sup> | 66.18±1.08 <sup>f</sup>   | 25.61±1.08 <sup>b</sup>   | 8.21±1.21 <sup>fg</sup>    |

Different letters in each column with different alphabets are statistically differences ( $p < 0.05$ ) among the treatments according to Duncan's test

**Table S4.** Climate factors of 17 different cultivation sites of *Hovenia dulcis*

| Cultivation sites | Annual mean temp | Annual mean max temp. | Annual mean min temp. | Annual max temp. | Annual min temp. | Duration of Sunshine | Precipitation |
|-------------------|------------------|-----------------------|-----------------------|------------------|------------------|----------------------|---------------|
|                   | (°C)             | (°C)                  | (°C)                  | (°C)             | (°C)             | (hr)                 | (mm)          |
| 1                 | 13.30            | 19.30                 | 8.30                  | 36.20            | -9.50            | 180.10               | 178.07        |
| 2                 | 15.00            | 20.70                 | 10.40                 | 37.80            | -8.20            | 177.65               | 157.71        |
| 3                 | 15.20            | 20.50                 | 10.90                 | 36.90            | -7.70            | 183.63               | 149.88        |
| 4                 | 13.30            | 19.30                 | 8.30                  | 36.20            | -9.50            | 180.10               | 178.07        |
| 5                 | 13.30            | 19.30                 | 8.30                  | 36.20            | -9.50            | 180.10               | 178.07        |
| 6                 | 13.90            | 19.60                 | 9.00                  | 35.10            | -10.10           | 187.89               | 122.46        |
| 7                 | 15.10            | 19.40                 | 11.40                 | 36.90            | -10.10           | 213.10               | 103.21        |
| 8                 | 15.00            | 20.00                 | 11.00                 | 35.70            | -7.30            | 191.23               | 151.75        |
| 9                 | 14.60            | 19.80                 | 9.80                  | 35.10            | -7.60            | 185.93               | 143.02        |
| 10                | 15.10            | 18.60                 | 12.20                 | 32.60            | -7.00            | 208.74               | 145.99        |
| 11                | 15.10            | 18.60                 | 12.20                 | 32.60            | -7.00            | 208.74               | 145.99        |
| 12                | 12.80            | 18.90                 | 7.70                  | 34.80            | -12.40           | 173.44               | 135.40        |
| 13                | 12.60            | 18.00                 | 8.00                  | 34.90            | -10.50           | 198.78               | 124.06        |
| 14                | 12.80            | 18.00                 | 8.00                  | 34.70            | -12.60           | 196.41               | 134.14        |
| 15                | 12.80            | 18.00                 | 8.00                  | 34.70            | -12.60           | 196.41               | 134.14        |
| 16                | 11.00            | 17.10                 | 5.30                  | 33.90            | -20.30           | 179.36               | 129.32        |
| 17                | 11.00            | 17.10                 | 5.30                  | 33.90            | -20.30           | 179.36               | 129.32        |
